# Supplementary material
Source: PubMed Central journal article supplement (PMC4915247)
Supplement: npp201511x1.pdf [file npp201511x1.pdf]

## Figure S1

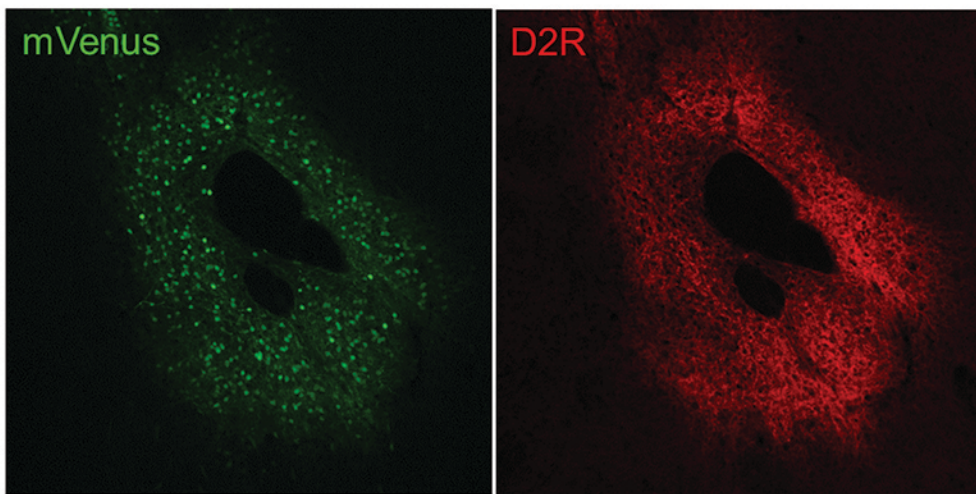

**Figure S1.** Representative images demonstrating that mVenus and D2R are stably and robustly overexpressed in the NAc 6 months after viral transduction. Note the lower endogenous D2R immunofluorescence in surrounding striatal regions.
