# Supplementary material
Source: PubMed Central journal article supplement (PMC4915247)
Supplement: npp201511x2.pdf [file npp201511x2.pdf]

Figure S2

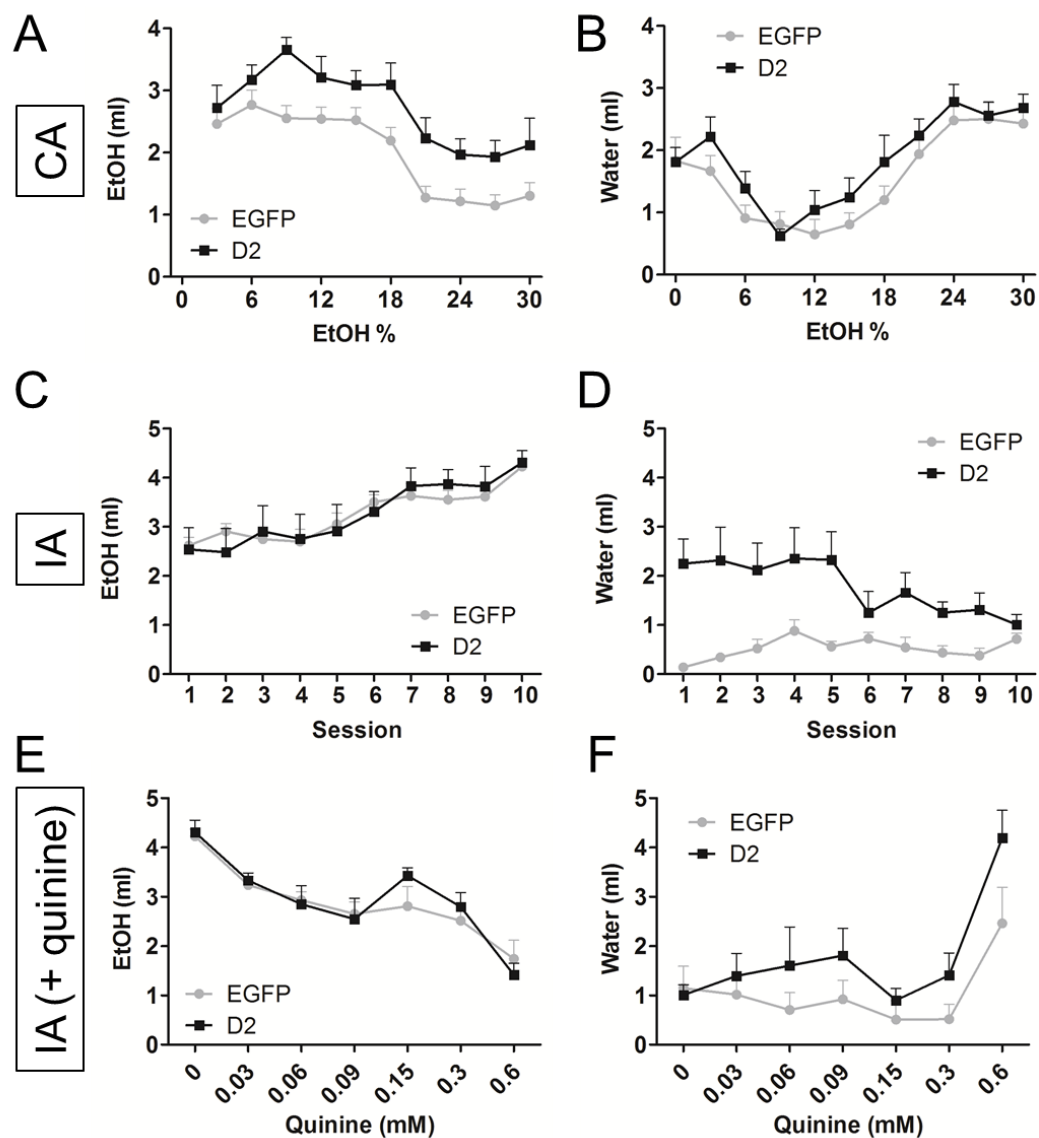

**Figure S2. A, B.** Absolute volumes of EtOH and water intake in the CA procedure. EtOH intake (ml) was significantly increased following D2R upregulation ( $p < 0.0001$ ,  $n = 8-9$  mice/group; 2-way ANOVA). Water intake was also higher in D2R<sub>NaClInd</sub> mice compared to controls ( $p < 0.05$ ,  $n = 8-9$  mice/group; 2-way ANOVA). **C.** EtOH volume consumed in IA sessions did not differ between the groups. **D.** D2R upregulation led to an overall increase in water intake ( $p < 0.01$ , 2-way ANOVA,  $n = 7-9$  mice/group). **E.** EtOH intake in the presence of increasing quinine doses was equivalent in both groups. **F.** Water intake was significantly increased in D2R<sub>NaClInd</sub> mice ( $p < 0.05$ , 2-way ANOVA,  $n = 7-9$  mice/group).
