# Supplementary material
Source: PubMed Central journal article supplement (PMC4915247)
Supplement: npp201511x3.pdf [file npp201511x3.pdf]

Figure S3

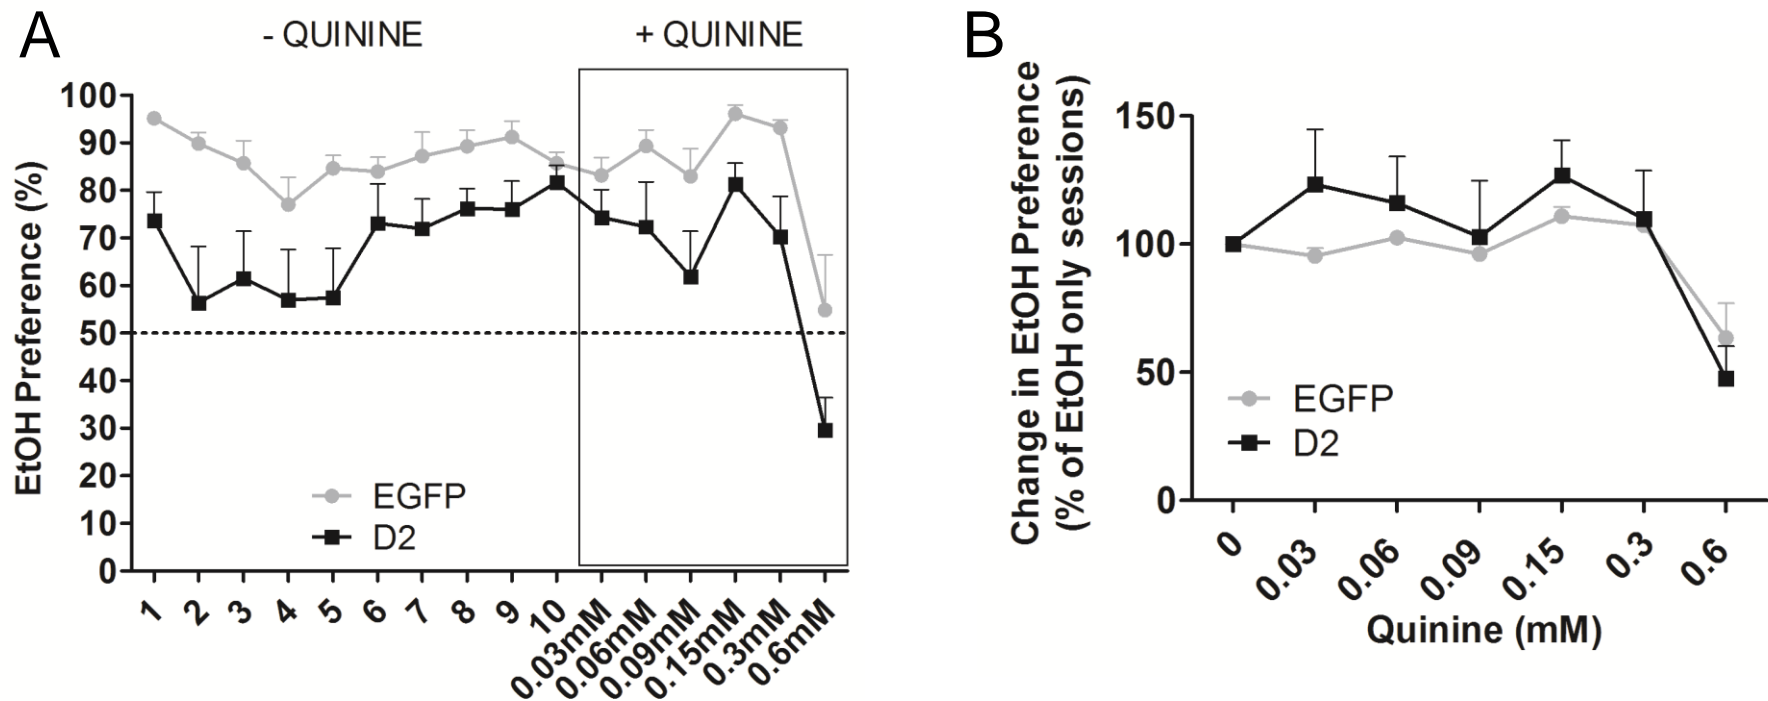

**Figure S3. A.** Combined plot of Manuscript Figures 4c and 5b. The reduced EtOH preference in the IA procedure seen after D2R upregulation is maintained in the sessions where quinine was used. **B.** The change in EtOH preference as a result of quinine is not significantly different between groups when normalized to preference values before quinine ( $p=0.65$ , 2-way RM ANOVA).
